# Supplementary material for: Surface grafting and reactivity of calixarene-based receptors and pseudorotaxanes on Si(100)
Source: Royal Society of Chemistry journal article supplement (doi:10.1039/c0cp01916j), 2011-01-01

Electronic Supporting Information

# Surface Grafting and Reactivity of Calixarene-based Receptors and of Pseudorotaxanes on Si(100)

Alice Boccia,<sup>a</sup> Valeria Lanzilotto,<sup>a</sup> Robertino Zanoni,<sup>\*a</sup> Luca Pescatori,<sup>b</sup>  
Arturo Arduini,<sup>b</sup> and Andrea Secchi<sup>\*b</sup>

<sup>a</sup> Dipartimento di Chimica, Università degli Studi di Roma 'La Sapienza', p.le Aldo Moro 5, I-00185 Roma, Italy. Fax: +39 06 06490324; Tel: +39 06 49913328; E-mail: robertino.zanoni@uniroma1.it

<sup>b</sup> Dipartimento di Chimica Organica e Industriale and Unità INSTM Sez. 4 - UdR Parma, Università di Parma, Parco Area delle Scienze 17/a, I-43124 Parma, Italy. Fax: +39 0521 905472; Tel: +39 0521 905409; E-mail: andrea.secchi@unipr.it

## TABLE OF CONTENTS

|                                                                                          |    |
|------------------------------------------------------------------------------------------|----|
| Figure S1. <sup>1</sup> H NMR spectrum of <b>2b</b> in CDCl <sub>3</sub> .....           | S2 |
| Figure S2. <sup>13</sup> C NMR spectrum of <b>2b</b> in CDCl <sub>3</sub> .....          | S2 |
| Figure S3. <sup>1</sup> H NMR spectrum of <b>3</b> in CDCl <sub>3</sub> .....            | S3 |
| Figure S4. <sup>13</sup> C NMR spectrum of <b>3</b> in CDCl <sub>3</sub> .....           | S3 |
| Figure S5. <sup>1</sup> H NMR spectrum of <b>6</b> in DMSO- <i>d</i> <sub>6</sub> .....  | S4 |
| Figure S6. <sup>13</sup> C NMR spectrum of <b>6</b> in DMSO- <i>d</i> <sub>6</sub> ..... | S4 |

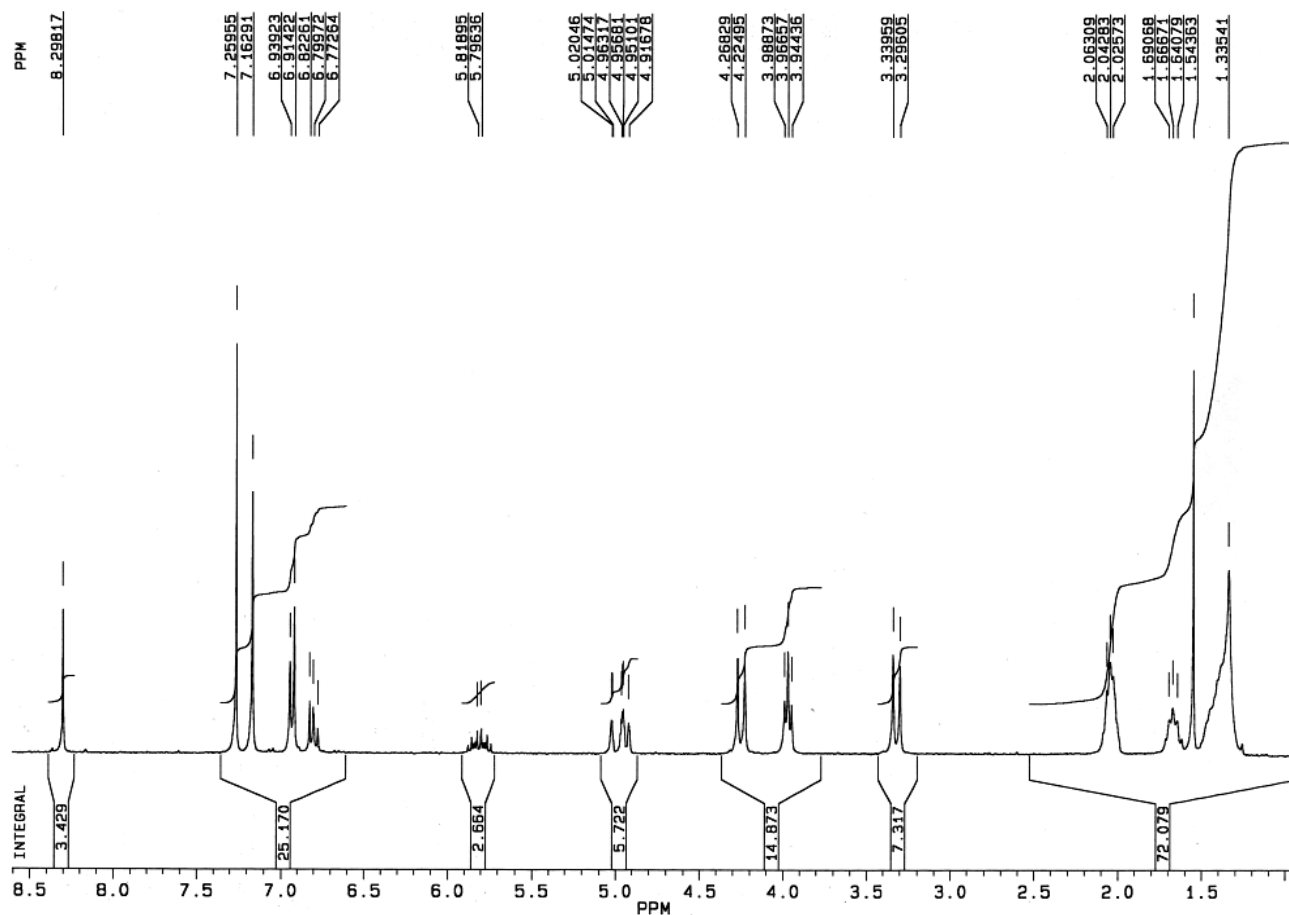

Figure S1.  $^1\text{H}$  NMR (300 MHz) spectrum of **2a** in  $\text{CDCl}_3$

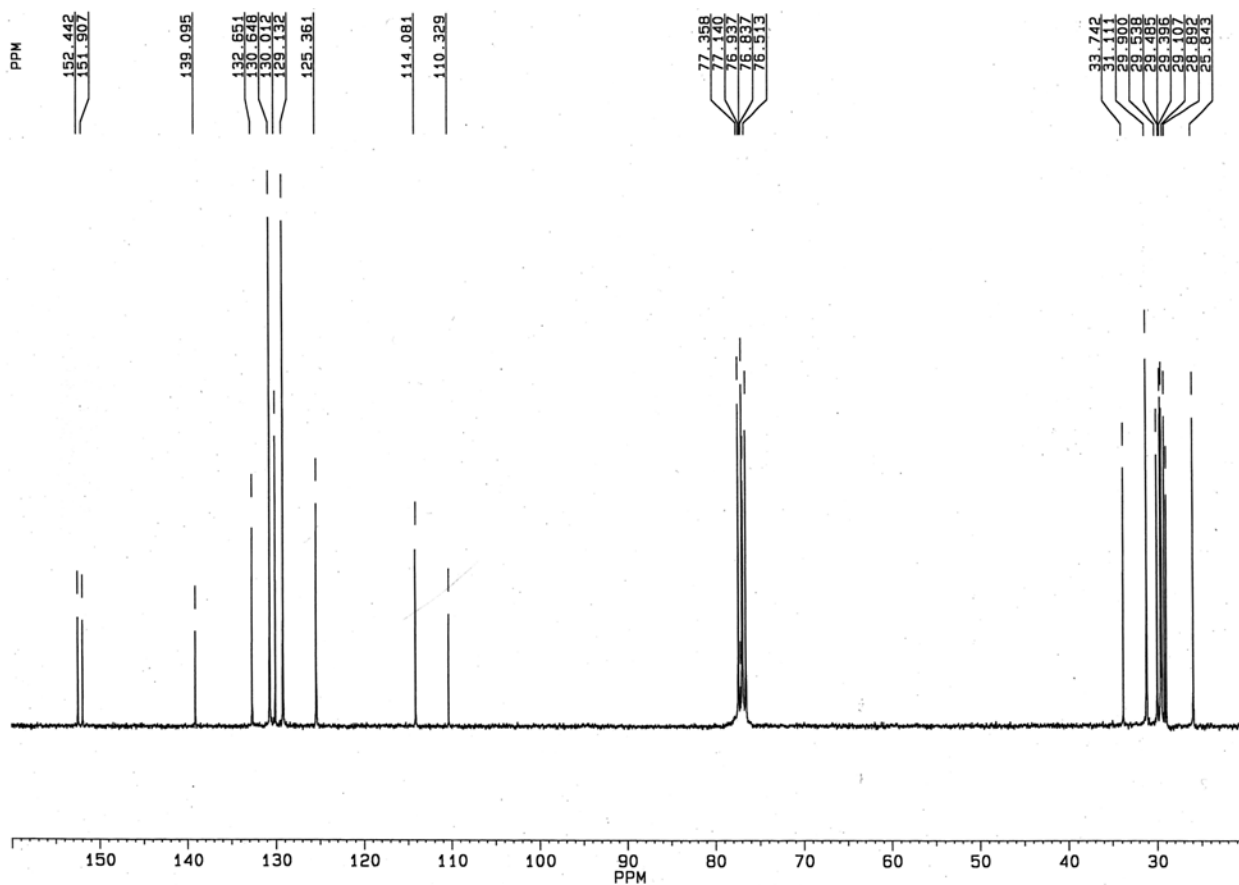

Figure S2.  $^{13}\text{C}$  NMR (75 MHz) spectrum of **2a** in  $\text{CDCl}_3$ .

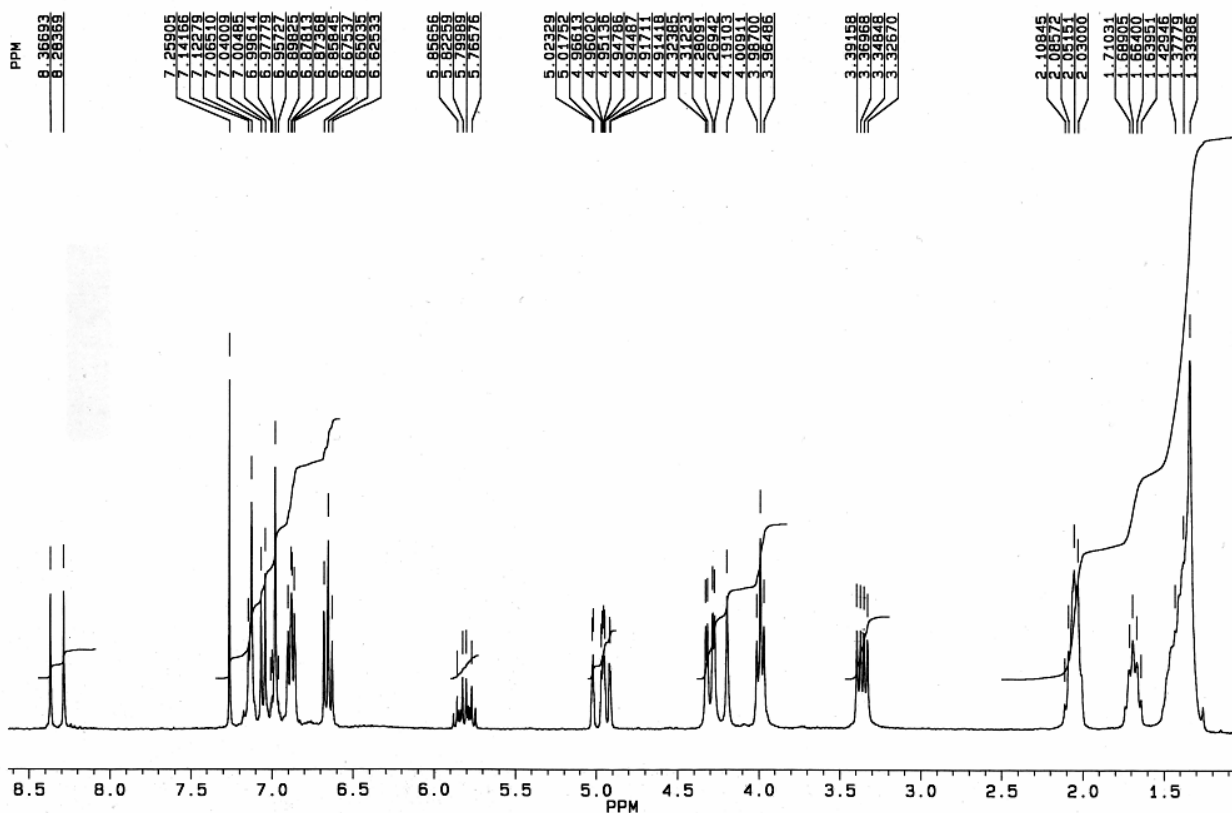

Figure S3.  $^1\text{H}$  NMR spectrum of **3** in  $\text{CDCl}_3$

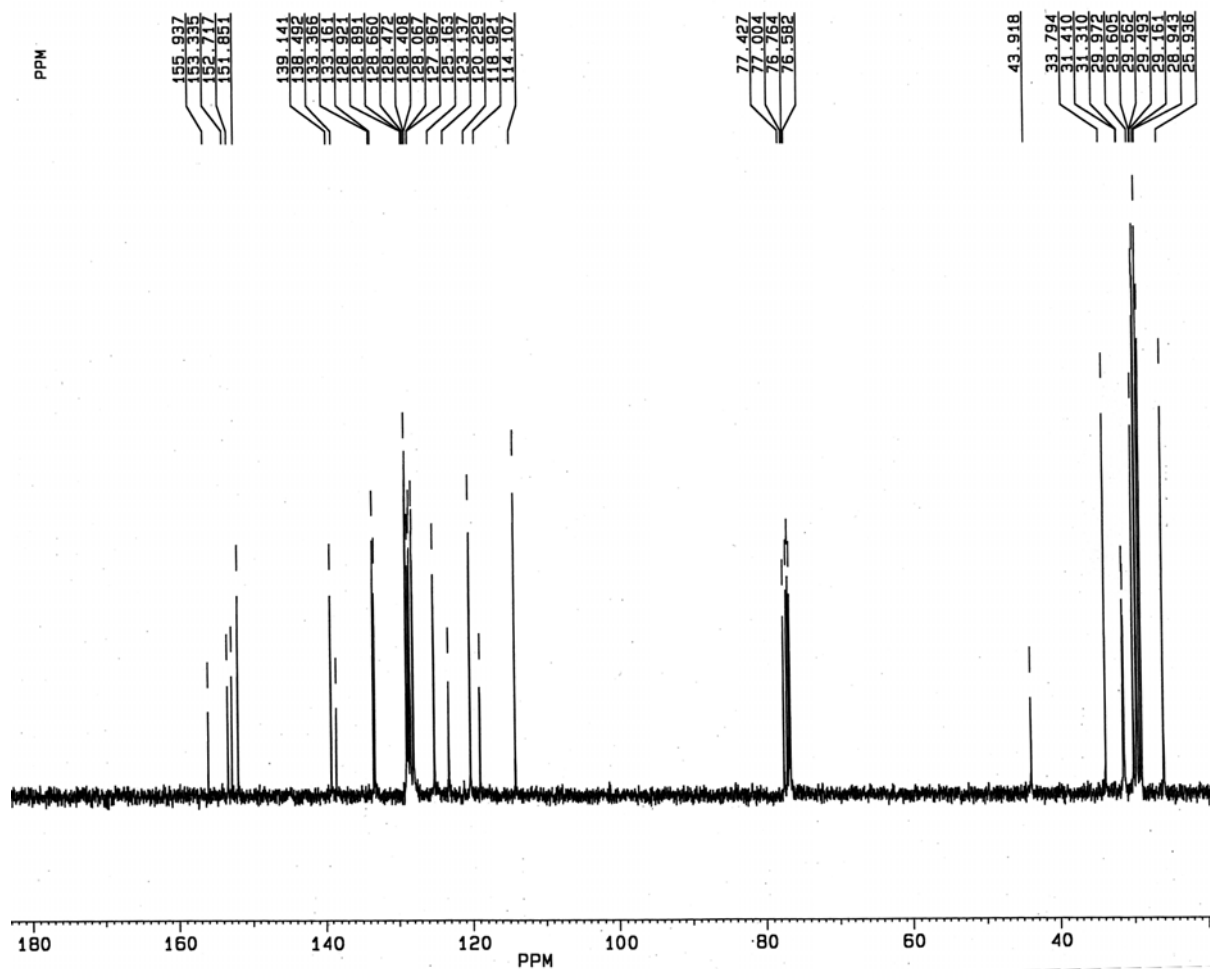

Figure S4.  $^{13}\text{C}$  NMR (75 MHz) spectrum of **3** in  $\text{CDCl}_3$

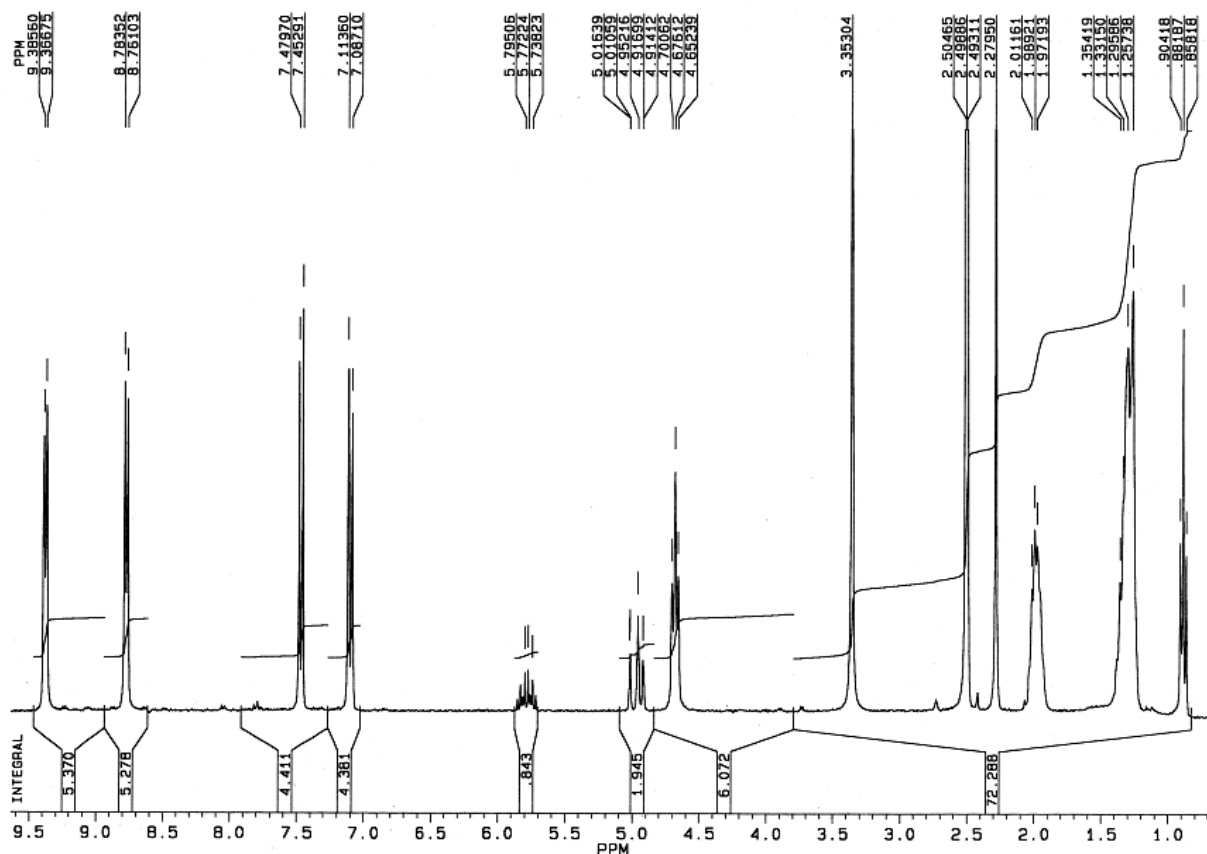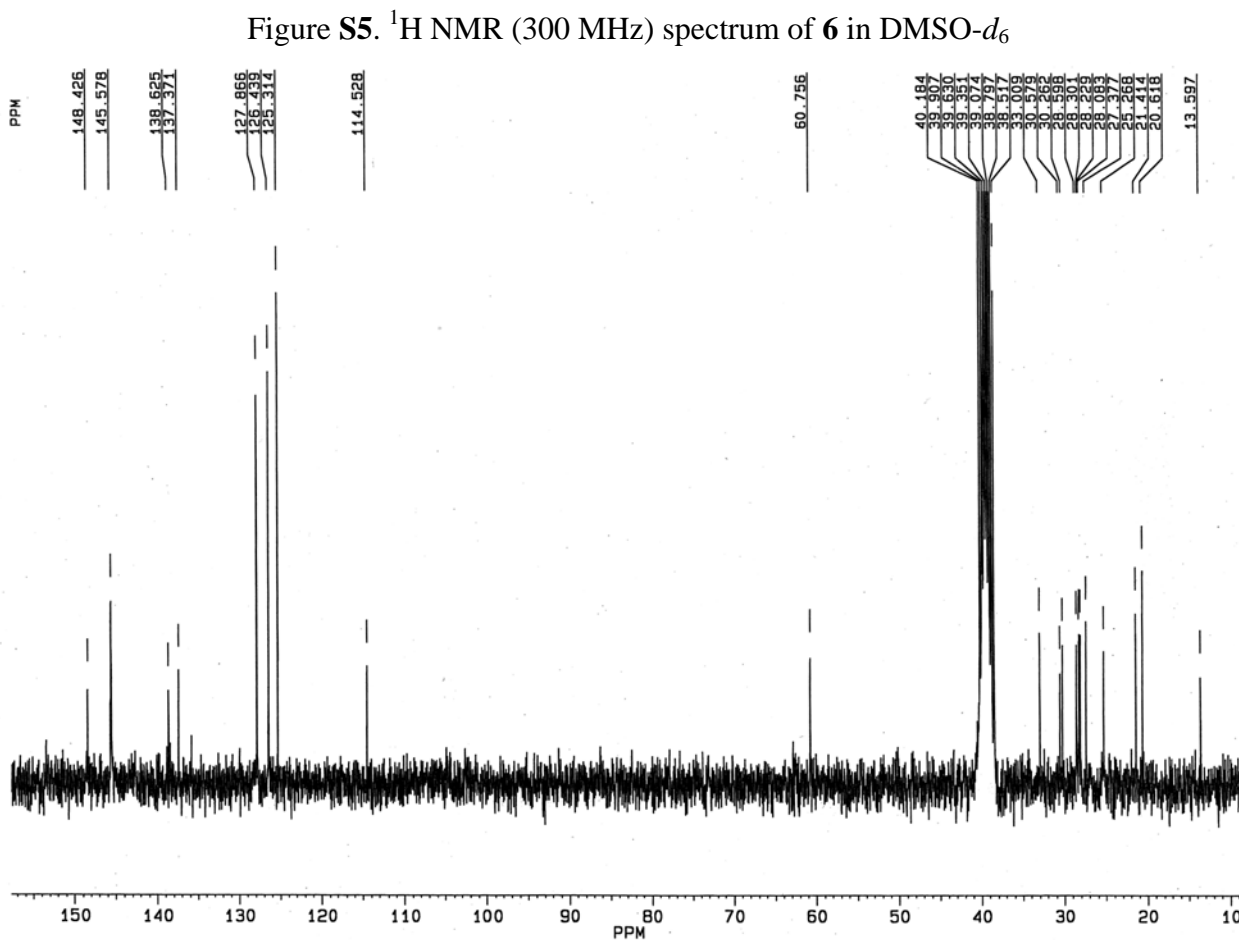

Supplement: c0cp01916j.pdf [file c0cp01916j.pdf]
